# Supplementary material for: DNA Barcoding to Enhance Conservation of Sunshine Coast Heathlands
Source: MDPI journal article supplement (doi:10.3390/d14060436), 2022-05-29
Supplement: s1 [file s1]

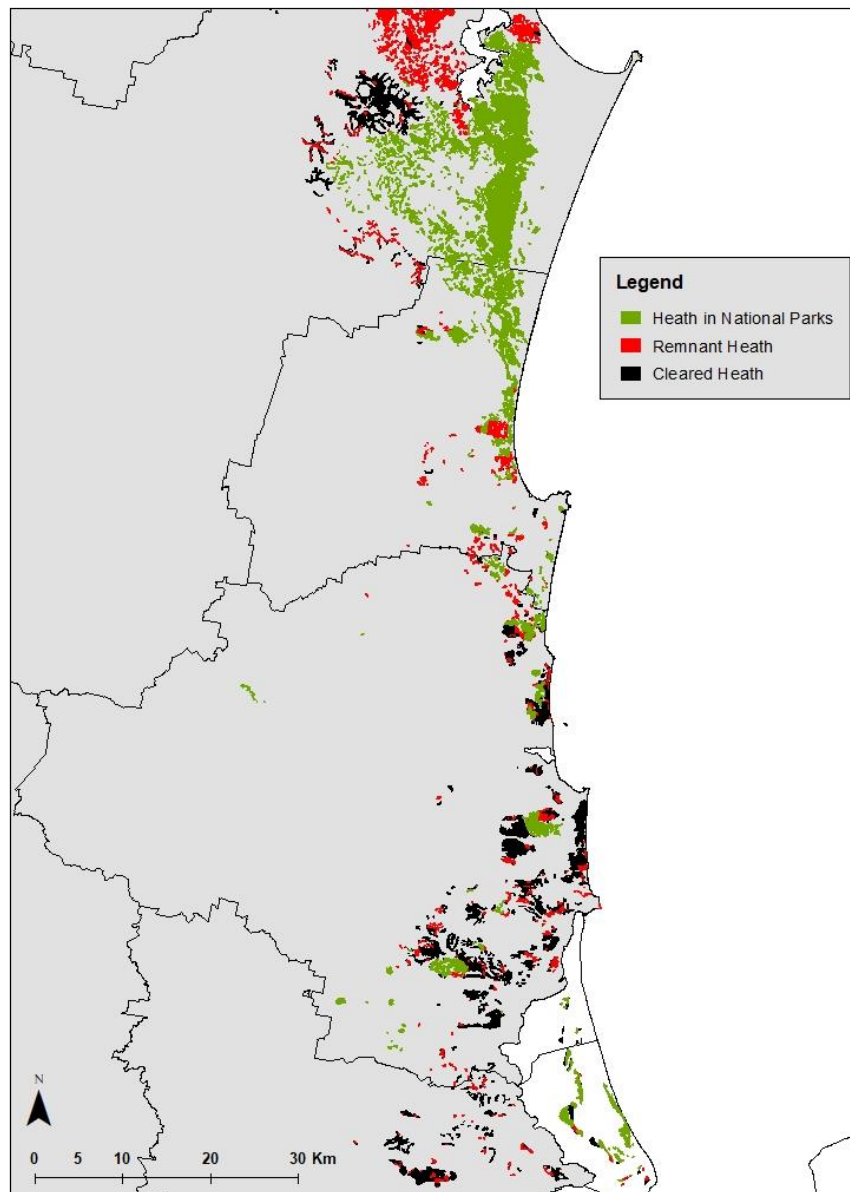

**Supplementary Figure S1:** Map of the study area showing the areas of heath that have been cleared (in black), the areas of heath currently protected in National Parks (in green), and the remaining areas of heath (in red) tenured privately, or in lower levels of protection. The large area of National Park at the top of the map is the Coolooloo section of the Great Sandy National Park. The major population centers are in the mid to southern coastal sections of the map.

This data is prepared in ArcMap 10.7.1, using shapefile from the following data sources:

**Department of Environment and Science.** (2020). *Protected areas of Queensland - boundaries*. Retrieved from: <http://qldspatial.information.qld.gov.au/catalogue/custom/search.page?q=%22Protected%20areas%20of%20Queensland%20-%20boundaries%22>

**Queensland Herbarium.** (2021a). *Biodiversity status of pre-clearing regional ecosystems – Queensland*. Retrieved from: <http://qldspatial.information.qld.gov.au/catalogue/custom/search.page?q=%22Biodiversity%20status%20of%20pre-clearing%20regional%20ecosystems%20%E2%80%93%20Queensland%22>

**Queensland Herbarium.** (2021b). *Biodiversity status of remnant regional ecosystems*. Retrieved from: <http://qldspatial.information.qld.gov.au/catalogue/custom/search.page?q=%22Biodiversity%20status%20of%202019%20remnant%20regional%20ecosystems%20-%20Queensland%22>
